# Supplementary material for: Prediction of Outcome and Endovascular Treatment Benefit: Validation and Update of the MR PREDICTS Decision Tool
Source: PubMed Central journal article supplement (PMC8378416; doi:10.1161/strokeaha.120.032935), 2021-07-16
Supplement: str-52-2764-s001.pdf [file str-52-2764-s001.pdf]

## SUPPLEMENTAL MATERIAL

“Prediction of Outcome and Endovascular Treatment Benefit: Validation and Update of the MR PREDICTS Decision Tool”

| <b>Table of contents</b>                                                                                                                                                                            | <b>Page</b> |
|-----------------------------------------------------------------------------------------------------------------------------------------------------------------------------------------------------|-------------|
| Supplemental Figure I. Patient selection in the MR CLEAN Registry validation cohort                                                                                                                 | 2           |
| Supplemental Table I. Baseline characteristics of the HERMES validation cohort (n=1242) according to quintile of predicted treatment benefit.                                                       | 3           |
| Supplemental Table II. Odds ratios of the regression coefficients in the original model and the updated model (including interaction effects).                                                      | 4           |
| Supplemental Table III. Baseline characteristics of MR CLEAN Registry validation cohort (n=3156) according to category of predicted treatment benefit: low (<1%), moderate (1-10%), or high (>10%). | 5           |
| MR PREDICTS regression equation                                                                                                                                                                     | 6           |
| List of MR CLEAN Registry Investigators                                                                                                                                                             | 7           |

**Supplemental Figure I.** Patient selection in the MR CLEAN Registry validation cohort.

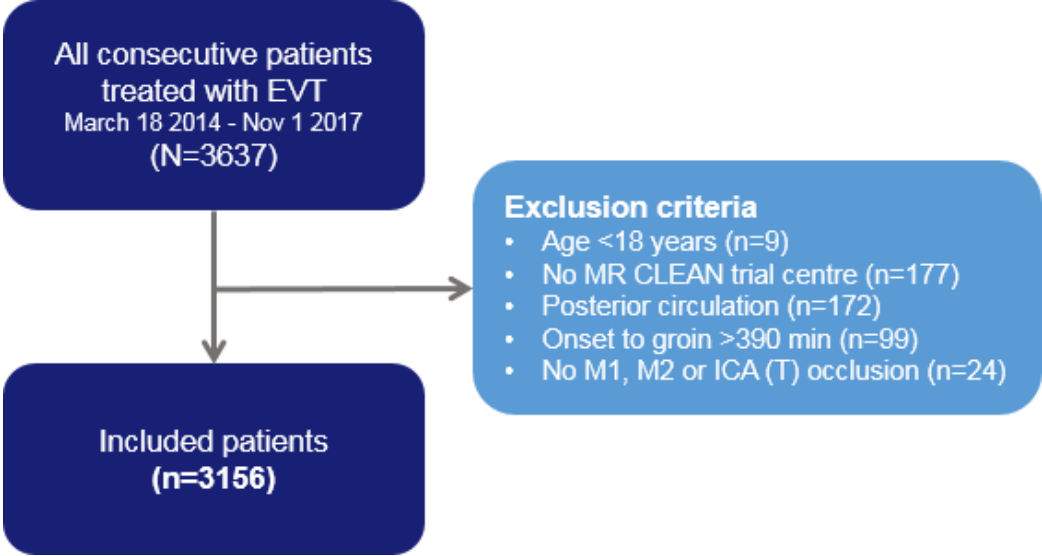

**Supplemental Table I.** Baseline characteristics of the HERMES validation cohort (n=1242) according to quintile of predicted treatment benefit.

|                                        | Lowest quintile  | Second quintile  | Middle quintile  | Fourth quintile  | Highest quintile | p-value |
|----------------------------------------|------------------|------------------|------------------|------------------|------------------|---------|
| Age, years                             | 75 (10)          | 69 (13)          | 64 (13)          | 61 (13)          | 60 (12)          | <0.001  |
| Male sex                               | 120 (48%)        | 128 (52%)        | 120 (48%)        | 127 (51%)        | 135 (54%)        | 0.60    |
| Baseline NIHSS score                   | 20 (17 to 22)    | 18 (16 to 21)    | 17 (13 to 20)    | 15 (12 to 18)    | 14 (11 to 17)    | <0.001  |
| Baseline systolic blood pressure, mmHg | 158 (27)         | 148 (24)         | 144 (22)         | 143 (20)         | 137 (22)         | <0.001  |
| Treatment with IV alteplase            | 190 (76%)        | 214 (86%)        | 232 (93%)        | 237 (96%)        | 237 (95%)        | <0.001  |
| Previous stroke                        | 43 (18%)         | 27 (11%)         | 24 (9.7%)        | 15 (6.2%)        | 24 (9.6%)        | 0.002   |
| Pre-stroke mRS                         |                  |                  |                  |                  |                  | <0.001  |
| 0                                      | 113 (70%)        | 112 (81%)        | 134 (89%)        | 134 (88%)        | 154 (91%)        |         |
| 1                                      | 41 (25%)         | 26 (19%)         | 13 (8.7%)        | 17 (11%)         | 15 (8.8%)        |         |
| ≥2                                     | 8 (4.9%)         | 1 (0.7%)         | 3 (2.0%)         | 3 (1.3%)         | 1 (0.6%)         |         |
| ASPECTS                                | 8 (6 to 9)       | 8 (6 to 9)       | 8 (7 to 9)       | 8 (7 to 9)       | 8 (7 to 9)       | <0.001  |
| Collateral score                       |                  |                  |                  |                  |                  | <0.001  |
| 0                                      | 3 (1.8%)         | 1 (0.6%)         | 1 (0.6%)         | 0 (0%)           | 0 (0%)           |         |
| 1                                      | 38 (23%)         | 31 (20%)         | 18 (11%)         | 121 (7.5%)       | 141 (7.8%)       |         |
| 2                                      | 80 (49%)         | 75 (48%)         | 60 (36%)         | 69 (43%)         | 64 (36%)         |         |
| 3                                      | 42 (26%)         | 51 (32%)         | 90 (53%)         | 79 (49%)         | 101 (56%)        |         |
| Occlusion location                     |                  |                  |                  |                  |                  | <0.001  |
| ICA                                    | 107 (46%)        | 68 (29%)         | 48 (21%)         | 35 (16%)         | 26 (12%)         |         |
| M1                                     | 116 (50%)        | 150 (65%)        | 167 (71%)        | 170 (75%)        | 174 (78%)        |         |
| M2                                     | 8 (3.5%)         | 14 (6.0%)        | 19 (8.1%)        | 21 (9.3%)        | 22 (9.9%)        |         |
| Onset to groin puncture, minutes       | 270 (220 to 340) | 223 (181 to 285) | 235 (182 to 299) | 215 (159 to 271) | 214 (159 to 264) | <0.001  |

Data are reported as n (%), mean (SD), or median (IQR).

Abbreviations: ASPECTS = Alberta Stroke Program Early CT Score; ICA(-T) = intracranial carotid artery (terminus); IV = intravenous; M1 = middle cerebral artery segment 1; M2 = middle cerebral artery segment 2; mRS = modified Rankin Scale score; NIHSS = National Institutes of Health Stroke Scale.

**Supplemental Table II.** Odds ratios of the regression coefficients in the original model and the updated model (including interaction effects).

|                                                           | Original model | Updated model |
|-----------------------------------------------------------|----------------|---------------|
| Endovascular treatment*                                   | 2.35           | 1.49          |
| Age†                                                      |                |               |
| Each year under 65 years                                  | 1.00           | 0.99          |
| Each year from 65 years and above                         | 0.97           | 0.95          |
| Baseline NIHSS (per point)                                | 0.93           | 0.93          |
| Baseline systolic blood pressure†                         |                |               |
| Each 10 mmHg under 130 mmHg                               | 0.99           | 1.22          |
| Each 10 mmHg from 130 mmHg and above                      | 0.89           | 0.89          |
| Baseline glucose level†                                   |                |               |
| Each 10 mg/dL under 120 mg/dL                             | NA             | 0.97          |
| Each 10 mg/dL from 120 mg/dL and above                    | NA             | 0.98          |
| Treatment with IV alteplase                               | 1.70           | 1.10          |
| Previous stroke                                           |                |               |
| Main effect                                               | 0.90           | NA            |
| Interaction with treatment                                | 0.55           | NA            |
| Diabetes mellitus                                         | 0.61           | 0.63          |
| Pre-stroke mRS                                            | 0.69           | 0.65          |
| ASPECTS (per point)                                       | 1.12           | 1.13          |
| Level of occlusion on non-invasive imaging                |                |               |
| ICA(-T)                                                   | 0 (ref)        | 0 (ref)       |
| M1                                                        | 1.67           | 1.65          |
| M2                                                        | 2.28           | 2.42          |
| Collateral score                                          |                |               |
| Main effect                                               | 1.48           | 1.29          |
| Interaction with treatment                                | 1.13           | 1.26          |
| Time from onset stroke to groin puncture (per 30 minutes) |                |               |
| Main effect                                               | 0.92           | 0.94          |
| Interaction with treatment                                | 0.95           | 0.97          |

Presented common odds ratios with 95% confidence intervals reflect the effect on the reversed modified Rankin Scale (odds ratio >1 corresponds with better functional outcome).

\*The effect of endovascular treatment is partly incorporated in the interaction effects of previous stroke, collateral score and time to groin puncture with treatment.

†Modelled using a restricted cubic spline function.

Abbreviations: ASPECTS = Alberta Stroke Program Early CT Score, EVT = endovascular treatment; ICA(-T) = intracranial carotid artery (terminus), IV = intravenous, M1 = middle cerebral artery segment 1, M2 = middle cerebral artery segment 2, mRS = modified Rankin Scale, NA = not applicable, NIHSS = National Institutes of Health Stroke Scale.

**Supplemental Table III.** Baseline characteristics of MR CLEAN Registry validation cohort (n=3156) according to category of predicted treatment benefit: low (<1%), moderate (1-10%), or high (>10%).

| <b>Characteristic</b>                  | <b>Low benefit<br/>(n=135)</b> | <b>Moderate benefit<br/>(n=1390)</b> | <b>High benefit<br/>(n=1631)</b> | <b>p-value</b> |
|----------------------------------------|--------------------------------|--------------------------------------|----------------------------------|----------------|
| Age, years                             | 80 (12)                        | 72 (14)                              | 67 (14)                          | <0.001         |
| Male sex                               | 57 (42%)                       | 709 (51%)                            | 874 (54%)                        | 0.03           |
| Baseline NIHSS score                   | 20 (18 to 24)                  | 17 (13 to 21)                        | 14 (10 to 18)                    | <0.001         |
| Baseline systolic blood pressure, mmHg | 168 (27)                       | 151 (25)                             | 147 (23)                         | <0.001         |
| Treatment with IV alteplase            | 81 (60%)                       | 1030 (74%)                           | 1299 (80%)                       | <0.001         |
| Previous stroke                        | 29 (22%)                       | 282 (20%)                            | 216 (13%)                        | <0.001         |
| Pre-stroke mRS                         |                                |                                      |                                  | <0.001         |
| 0                                      | 39 (31%)                       | 816 (60%)                            | 1238 (77%)                       |                |
| 1                                      | 18 (14%)                       | 172 (13%)                            | 218 (14%)                        |                |
| ≥2                                     | 69 (55%)                       | 368 (27%)                            | 148 (9%)                         |                |
| ASPECTS                                | 8 (6 to 9)                     | 9 (7 to 10)                          | 9 (8 to 10)                      | <0.001         |
| Collateral score                       |                                |                                      |                                  | <0.001         |
| 0                                      | 68 (54%)                       | 118 (9.1%)                           | 0 (0%)                           |                |
| 1                                      | 50 (40%)                       | 797 (62%)                            | 222 (14%)                        |                |
| 2                                      | 8 (6.3%)                       | 313 (24%)                            | 831 (54%)                        |                |
| 3                                      | 0 (0%)                         | 75 (5.8%)                            | 482 (31%)                        |                |
| Occlusion location                     |                                |                                      |                                  | <0.001         |
| ICA                                    | 66 (52%)                       | 405 (31%)                            | 324 (21%)                        |                |
| M1                                     | 58 (45%)                       | 724 (55%)                            | 982 (63%)                        |                |
| M2                                     | 4 (3.1%)                       | 187 (14%)                            | 250 (16%)                        |                |
| Onset to groin puncture, minutes       | 271 (219 to 323)               | 212 (169 to 270)                     | 170 (135 to 220)                 | <0.001         |

Data are reported as n (%), mean (SD), or median (IQR).

Abbreviations: ASPECTS = Alberta Stroke Program Early CT Score; ICA(-T) = intracranial carotid artery (terminus); IV = intravenous; M1 = middle cerebral artery segment 1; M2 = middle cerebral artery segment 2; mRS = modified Rankin Scale score; NIHSS = National Institutes of Health Stroke Scale.

## MR PREDICTS regression equation

### Variable definitions

- EVT 0=no, 1=yes
- age numeric, in years
- NIHSS numeric, range 0-42
- premrs numeric, range 0-5
- diabetes 0=no, 1=yes
- BP numeric, in mmHg
- IVT 0=no, 1=yes
- glucose numeric, in mg/dL
- ASPECTS numeric, range 0-10
- location categorical: "ICA-(T)", "M1", "M2"
- collaterals numeric, range 0-3
- onsetgroin numeric, in minutes

### Intercept

|         | First validation cohort (HERMES) | Second validation cohort (Registry) |
|---------|----------------------------------|-------------------------------------|
| mRS 0   | -1.35209                         | -1.95789                            |
| mRS 0-1 | -0.0966187                       | -0.423007                           |
| mRS 0-2 | 0.854397                         | 0.704584                            |
| mRS 0-3 | 1.68040                          | 1.47090                             |
| mRS 0-4 | 2.86330                          | 2.16359                             |
| mRS 0-5 | 3.52439                          | 2.52240                             |

### Predicted probability (R code)

```
plogis(0.401368*EVT - 0.0118443*age - 1.92454e-05*pmax(age-46,0)^3 + 4.98209e-05*pmax(age-67.5,0)^3 - 3.05755e-05*pmax(age-81,0)^3 - 0.0737296*NIHSS - 0.427549*premrs - 0.458441*diabetes + 0.00124704*BP - 3.38789e-06*pmax(BP-115,0)^3 + 6.45817e-06*pmax(BP-144,0)^3 - 3.07028e-06*pmax(BP-176,0)^3 + 0.0947369*IVT - 0.00469116*glucose + 4.51697e-07*pmax(glucose-94.5,0)^3 - 7.22715e-07*pmax(glucose-121.8,0)^3 + 2.71018e-07*pmax(glucose-167.3,0)^3 + 0.122167*ASPECTS + 0.501521*(location=="M1") + 0.883908*(location=="M2") + 0.258226*collaterals + (0.230021*EVT*collaterals) - 0.00213380*onsetgroin - (0.00116301*EVT*onsetgroin) + intercept)
```

## List of MR CLEAN Registry Investigators

### Executive committee

Diederik W.J. Dippel<sup>1</sup>; Aad van der Lugt<sup>2</sup>; Charles B.L.M. Majoie<sup>3</sup>; Yvo B.W.E.M. Roos<sup>4</sup>; Robert J. van Oostenbrugge<sup>5</sup>; Wim H. van Zwam<sup>6</sup>; Jelis Boiten<sup>14</sup>; Jan Albert Vos<sup>8</sup>

### Study coordinators

Ivo G.H. Jansen<sup>3</sup>; Maxim J.H.L. Mulder<sup>1,2</sup>; Robert-Jan B. Goldhoorn<sup>5,6</sup>; Kars C.J. Compagne<sup>2</sup>; Manon Kappelhof<sup>3</sup>; Josje Brouwer<sup>4</sup>; Sanne J. den Hartog<sup>1,2,40</sup>; Wouter H. Hinsenveld<sup>5,6</sup>

### Local principal investigators

Diederik W.J. Dippel<sup>1</sup>; Bob Roozenbeek<sup>1</sup>; Aad van der Lugt<sup>2</sup>; Adriaan C.G.M. van Es<sup>2</sup>; Charles B.L.M. Majoie<sup>3</sup>; Yvo B.W.E.M. Roos<sup>4</sup>; Bart J. Emmer<sup>3</sup>; Jonathan M. Coutinho<sup>4</sup>; Wouter J. Schonewille<sup>7</sup>; Jan Albert Vos<sup>8</sup>; Marieke J.H. Wermer<sup>9</sup>; Marianne A.A. van Walderveen<sup>10</sup>; Julie Staals<sup>5</sup>; Robert J. van Oostenbrugge<sup>5</sup>; Wim H. van Zwam<sup>6</sup>; Jeannette Hofmeijer<sup>11</sup>; Jasper M. Martens<sup>12</sup>; Geert J. Lycklama à Nijeholt<sup>13</sup>; Jelis Boiten<sup>14</sup>; Sebastiaan F. de Bruijn<sup>15</sup>; Lukas C. van Dijk<sup>16</sup>; H. Bart van der Worp<sup>17</sup>; Rob H. Lo<sup>18</sup>; Ewoud J. van Dijk<sup>19</sup>; Hieronymus D. Boogaarts<sup>20</sup>; J. de Vries<sup>22</sup>; Paul L.M. de Kort<sup>21</sup>; Julia van Tuijl<sup>21</sup>; Jo P. Peluso<sup>26</sup>; Puck Fransen<sup>22</sup>; Jan S.P. van den Berg<sup>22</sup>; Boudewijn A.A.M. van Hasselt<sup>23</sup>; Leo A.M. Aerden<sup>24</sup>; René J. Dallinga<sup>25</sup>; Maarten Uyttenboogaart<sup>28</sup>; Omid Eschgi<sup>29</sup>; Reinoud P.H. Bokkers<sup>29</sup>; Tobien H.C.M.L. Schreuder<sup>30</sup>; Roel J.J. Heijboer<sup>31</sup>; Koos Keizer<sup>32</sup>; Lonneke S.F. Yo<sup>33</sup>; Heleen M. den Hertog<sup>22</sup>; Tomas Bulut<sup>35</sup>; Paul J.A.M. Brouwers<sup>34</sup>

### Imaging assessment committee

Charles B.L.M. Majoie<sup>3</sup>(chair); Wim H. van Zwam<sup>6</sup>; Aad van der Lugt<sup>2</sup>; Geert J. Lycklama à Nijeholt<sup>13</sup>; Marianne A.A. van Walderveen<sup>10</sup>; Marieke E.S. Sprengers<sup>3</sup>; Sjoerd F.M. Jenniskens<sup>27</sup>; René van den Berg<sup>3</sup>; Albert J. Yoo<sup>38</sup>; Ludo F.M. Beenen<sup>3</sup>; Alida A. Postma<sup>6</sup>; Stefan D. Roosendaal<sup>3</sup>; Bas F.W. van der Kallen<sup>13</sup>; Ido R. van den Wijngaard<sup>13</sup>; Adriaan C.G.M. van Es<sup>2</sup>; Bart J. Emmer<sup>3</sup>; Jasper M. Martens<sup>12</sup>; Lonneke S.F. Yo<sup>33</sup>; Jan Albert Vos<sup>8</sup>; Joost Bot<sup>36</sup>; Pieter-Jan van Doormaal<sup>2</sup>; Anton Meijer<sup>27</sup>; Elyas Ghariq<sup>13</sup>; Reinoud P.H. Bokkers<sup>29</sup>; Marc P. van Proosdij<sup>37</sup>; G. Menno Krietemeijer<sup>33</sup>; Jo P. Peluso<sup>26</sup>; Hieronymus D. Boogaarts<sup>20</sup>; Rob Lo<sup>18</sup>; Dick Gerrits<sup>35</sup>; Wouter Dinkelaar<sup>2</sup>; Auke P.A. Appelman<sup>29</sup>; Bas Hammer<sup>16</sup>; Sjoert Pegge<sup>27</sup>; Anouk van der Hoorn<sup>29</sup>; Saman Vinke<sup>20</sup>.

### Writing committee

Diederik W.J. Dippel<sup>1</sup>(chair); Aad van der Lugt<sup>2</sup>; Charles B.L.M. Majoie<sup>3</sup>; Yvo B.W.E.M. Roos<sup>4</sup>; Robert J. van Oostenbrugge<sup>5</sup>; Wim H. van Zwam<sup>6</sup>; Geert J. Lycklama à Nijeholt<sup>13</sup>; Jelis Boiten<sup>14</sup>; Jan Albert Vos<sup>8</sup>; Wouter J. Schonewille<sup>7</sup>; Jeannette Hofmeijer<sup>11</sup>; Jasper M. Martens<sup>12</sup>; H. Bart van der Worp<sup>17</sup>; Rob H. Lo<sup>18</sup>

### Adverse event committee

Robert J. van Oostenbrugge<sup>5</sup>(chair); Jeannette Hofmeijer<sup>11</sup>; H. Zwenneke Flach<sup>23</sup>

### Trial methodologist

Hester F. Lingsma<sup>40</sup>

### Research nurses / local trial coordinators

Naziha el Ghannouti<sup>1</sup>; Martin Sterrenberg<sup>1</sup>; Wilma Pellikaan<sup>7</sup>; Rita Sprengers<sup>4</sup>; Marjan Elfrink<sup>11</sup>; Michelle Simons<sup>11</sup>; Marjolein Vossers<sup>12</sup>; Joke de Meris<sup>14</sup>; Tamara Vermeulen<sup>14</sup>; Annet Geerlings<sup>19</sup>; Gina van Vemde<sup>22</sup>; Tiny Simons<sup>30</sup>; Gert Messchendorp<sup>28</sup>; Nynke Nicolaij<sup>28</sup>; Hester Bongenaar<sup>32</sup>; Karin Bodde<sup>24</sup>; Sandra Kleijn<sup>34</sup>; Jasmijn Lodico<sup>34</sup>; Hanneke Droste<sup>34</sup>; Maureen Wollaert<sup>5</sup>; Sabrina Verheesen<sup>5</sup>; D. Jeurissen<sup>5</sup>; Erna Bos<sup>9</sup>; Yvonne Drabbe<sup>15</sup>; Michelle Sandiman<sup>15</sup>; Nicoline Aaldering<sup>11</sup>; Berber Zweedijk<sup>17</sup>; Jocova Vervoort<sup>21</sup>; Eva Ponjee<sup>22</sup>; Sharon Romviel<sup>19</sup>; Karin Kanselaar<sup>19</sup>; Denn Barning<sup>10</sup>.

### PhD / Medical students:

Esmee Venema<sup>40</sup>; Vicky Chalos<sup>1,40</sup>; Ralph R. Geuskens<sup>3</sup>; Tim van Straaten<sup>19</sup>; Saliha Ergezen<sup>1</sup>; Roger R.M. Harmsma<sup>1</sup>; Daan Muijres<sup>1</sup>; Anouk de Jong<sup>1</sup>; Olvert A. Berkhemer<sup>1,3,6</sup>; Anna M.M. Boers<sup>3,39</sup>; J. Huguet<sup>3</sup>; P.F.C.

Groot<sup>3</sup>; Marieke A. Mens<sup>3</sup>; Katinka R. van Kranendonk<sup>3</sup>; Kilian M. Treurniet<sup>3</sup>; Manon L. Tolhuisen<sup>3,39</sup>; Heitor Alves<sup>3</sup>; Annick J. Weterings<sup>3</sup>; Eleonora L.F. Kirkels<sup>3</sup>; Eva J.H.F. Voogd<sup>11</sup>; Lieve M. Schupp<sup>3</sup>; Sabine L. Collette<sup>28,29</sup>; Adrien E.D. Groot<sup>4</sup>; Natalie E. LeCouffe<sup>4</sup>; Praneeta R. Konduri<sup>39</sup>; Haryadi Prasetya<sup>39</sup>; Nerea Arrarte-Terreros<sup>39</sup>; Lucas A. Ramos<sup>39</sup>.

### List of affiliations

Department of Neurology<sup>1</sup>, Radiology<sup>2</sup>, Public Health<sup>40</sup>, Erasmus MC University Medical Center;  
Department of Radiology and Nuclear Medicine<sup>3</sup>, Neurology<sup>4</sup>, Biomedical Engineering & Physics<sup>39</sup>, Amsterdam UMC, University of Amsterdam, Amsterdam;  
Department of Neurology<sup>5</sup>, Radiology<sup>6</sup>, Maastricht University Medical Center and Cardiovascular Research Institute Maastricht (CARIM);  
Department of Neurology<sup>7</sup>, Radiology<sup>8</sup>, Sint Antonius Hospital, Nieuwegein;  
Department of Neurology<sup>9</sup>, Radiology<sup>10</sup>, Leiden University Medical Center;  
Department of Neurology<sup>11</sup>, Radiology<sup>12</sup>, Rijnstate Hospital, Arnhem;  
Department of Radiology<sup>13</sup>, Neurology<sup>14</sup>, Haaglanden MC, the Hague;  
Department of Neurology<sup>15</sup>, Radiology<sup>16</sup>, Haga Hospital, the Hague;  
Department of Neurology<sup>17</sup>, Radiology<sup>18</sup>, University Medical Center Utrecht;  
Department of Neurology<sup>19</sup>, Neurosurgery<sup>20</sup>, Radiology<sup>27</sup>, Radboud University Medical Center, Nijmegen;  
Department of Neurology<sup>21</sup>, Radiology<sup>26</sup>, Elisabeth-TweeSteden ziekenhuis, Tilburg;  
Department of Neurology<sup>22</sup>, Radiology<sup>23</sup>, Isala Klinieken, Zwolle;  
Department of Neurology<sup>24</sup>, Radiology<sup>25</sup>, Reinier de Graaf Gasthuis, Delft;  
Department of Neurology<sup>28</sup>, Radiology<sup>29</sup>, University Medical Center Groningen;  
Department of Neurology<sup>30</sup>, Radiology<sup>31</sup>, Atrium Medical Center, Heerlen;  
Department of Neurology<sup>32</sup>, Radiology<sup>33</sup>, Catharina Hospital, Eindhoven;  
Department of Neurology<sup>34</sup>, Radiology<sup>35</sup>, Medisch Spectrum Twente, Enschede;  
Department of Radiology<sup>36</sup>, Amsterdam UMC, Vrije Universiteit van Amsterdam, Amsterdam;  
Department of Radiology<sup>37</sup>, Noordwest Ziekenhuisgroep, Alkmaar;  
Department of Radiology<sup>38</sup>, Texas Stroke Institute, Texas, United States of America.
